# Supplementary material for: Bakuchiol suppresses proliferation of skin cancer cells by directly targeting Hck, Blk, and p38 MAP kinase
Source: PubMed Central journal article supplement (PMC4924739; doi:10.18632/oncotarget.7524), 2016-02-20
Supplement: oncotarget-07-14616-s001.pdf [file oncotarget-07-14616-s001.pdf]

# Bakuchiol suppresses proliferation of skin cancer cells by directly targeting Hck, Blk, and p38 MAP kinase

## Supplementary Materials

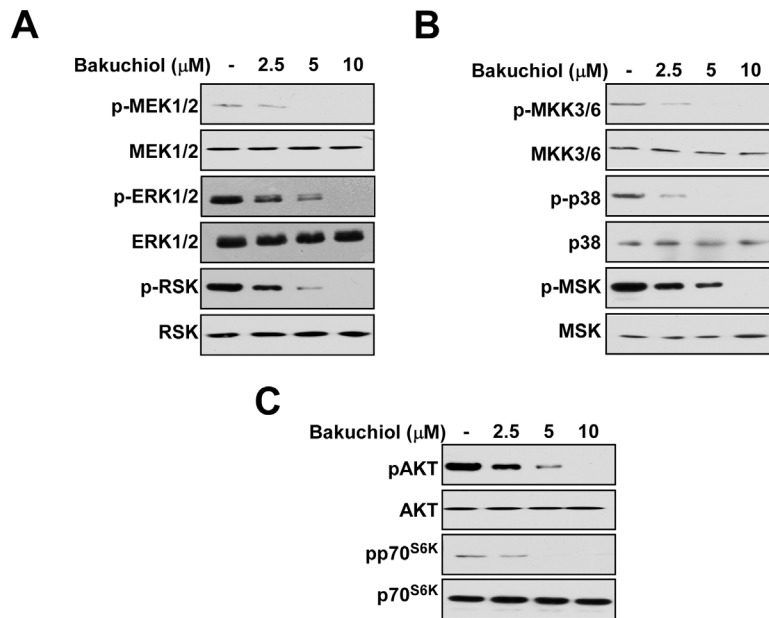

**Supplementary Figure S1: Effects of bakuchiol on signal transduction in A431 cells.** A431 cells were treated with bakuchiol (0, 2.5, 5, or 10 μM) for 48 h and harvested. Immunoblotting was conducted using specific antibodies.

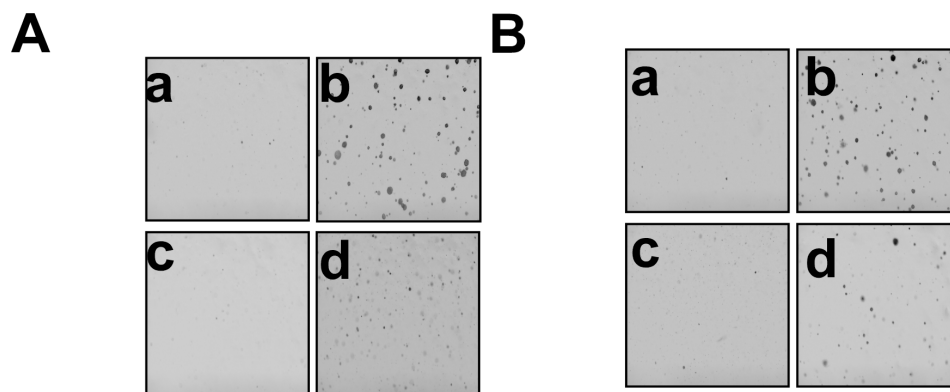

**Supplementary Figure S2: Corresponds to quantitative data shown in Figure 6A and 6B.**
